# Supplementary material for: Solution processing of highly conductive ruthenium and ruthenium oxide thin films from ruthenium–amine complexes
Source: Royal Society of Chemistry journal article supplement (doi:10.1039/c5tc00675a), 2015-01-01
Supplement: c5tc00675a1.pdf [file c5tc00675a1.pdf]

## **Solution processing of highly conductive ruthenium and ruthenium oxide thin films from ruthenium-amine complexes**

Yoshitaka Murakami<sup>1,2\*</sup>, Jinwang Li<sup>1,3\*</sup>, Daisuke Hirose<sup>1,3</sup>, Shinji Kohara<sup>4,5</sup>, Tatsuya Shimoda<sup>1,3,5</sup>

<sup>1</sup> Green Devices Research Center, Japan Advanced Institute of Science and Technology (JAIST), 2-13 Asahidai, Nomi, Ishikawa 923-1211, Japan

<sup>2</sup> JSR Corporation, Yokkaichi Research Center, 100 Kawajiri-cho, Yokkaichi, Mie 510-8552, Japan

<sup>3</sup> Japan Science and Technology Agency (JST), ERATO, Shimoda Nano-Liquid Process Project, 2-5-3 Asahidai, Nomi, Ishikawa 923-1211, Japan

<sup>4</sup> SPring-8/Japan Synchrotron Radiation Research Institute (JASRI), 1-1-1 Kouto, Sayo-cho, Sayo-gun, Hyogo 679-5198, Japan

<sup>5</sup> School of Materials Science, Japan Advanced Institute of Science and Technology (JAIST), 1-1 Asahidai, Nomi, Ishikawa 923-1292, Japan

### **Supplementary Information**

#### **Supplementary Figures**

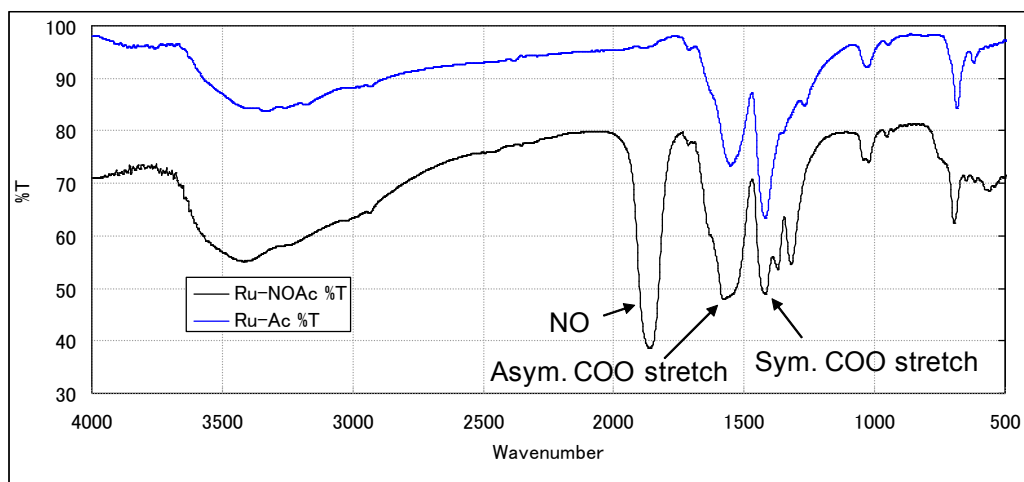

**Supplementary Figure S1.** FTIR spectra of ruthenium nitrosyl scetate (Ru-NOAc) and ruthenium acetate (Ru-Ac), indicating the band positions of NO and COO.

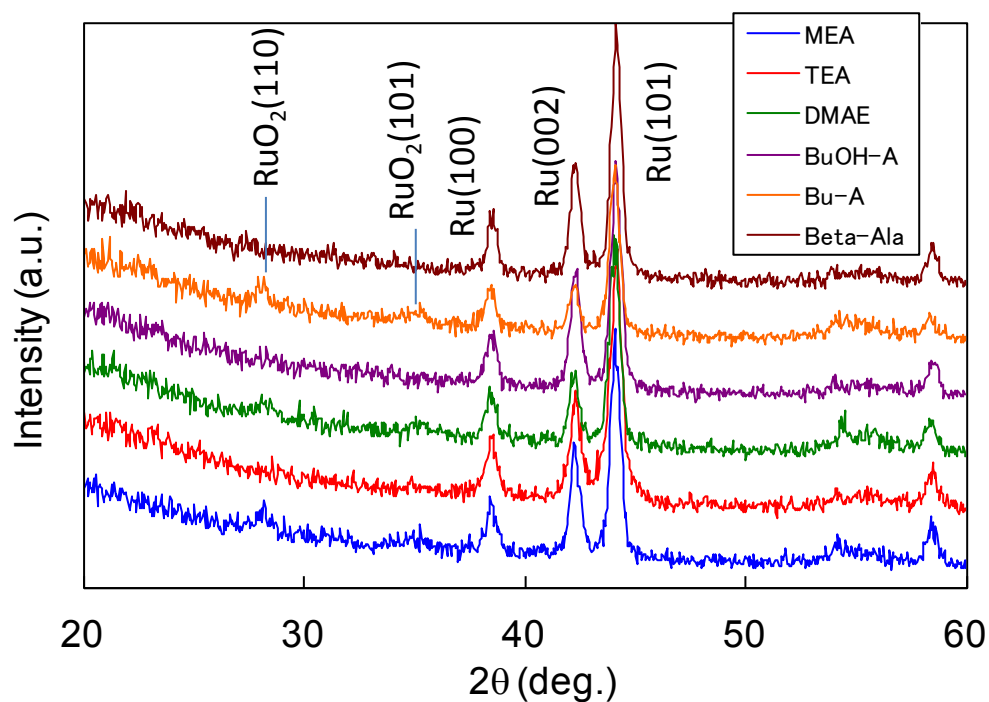

**Supplementary Figure S2.** XRD patterns of thin films prepared from solutions with different amines and annealed at 500°C in N<sub>2</sub>.

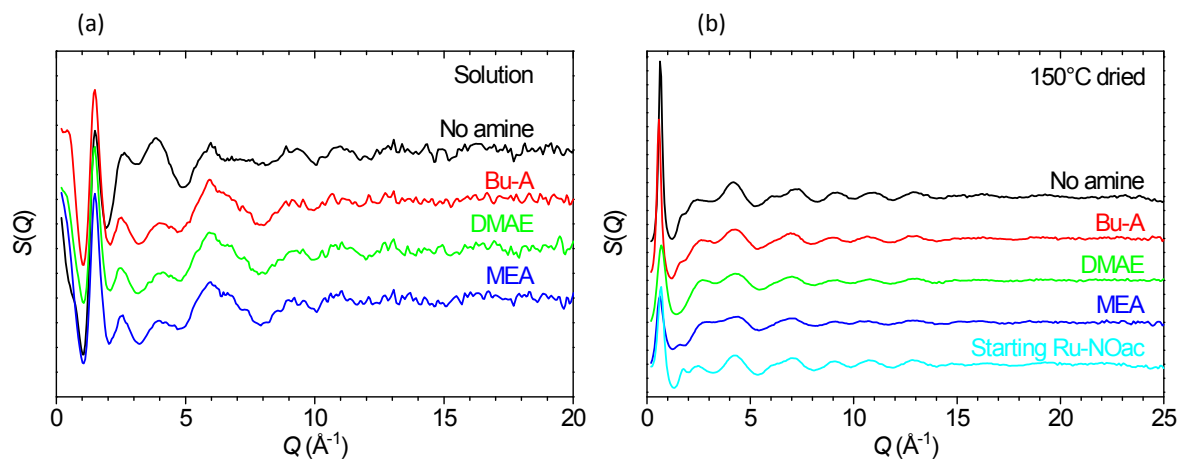

**Supplementary Figure S3.** Total structure factors,  $S(Q)$ , of the solutions with different amines (a) and of their 150°C-dried gels (b). The data for the starting material, ruthenium nitrosyl acetate, is presented in (b) as reference.

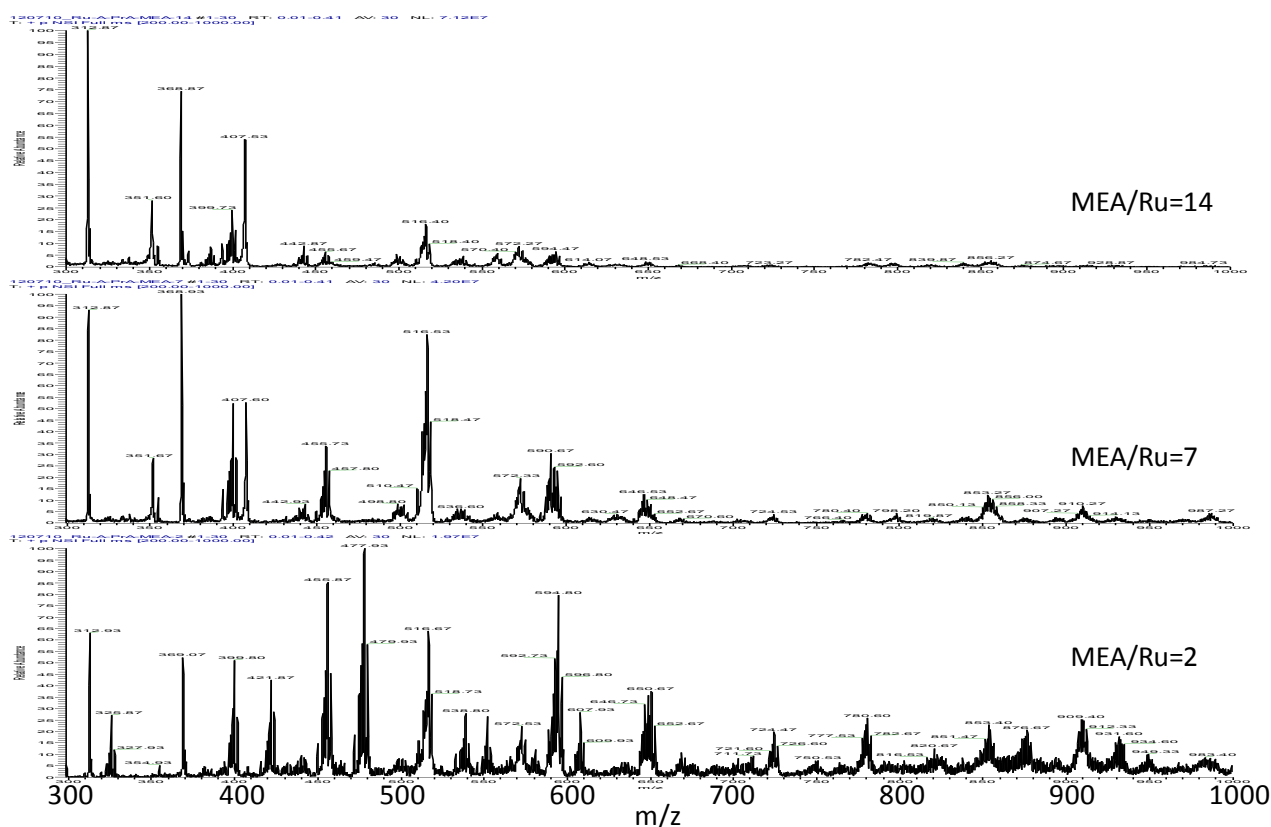

**Supplementary Figure S4.** EI-MS spectra of solutions with different amount of MEA. Complexes may have partially dissociated during ionization without cooling.

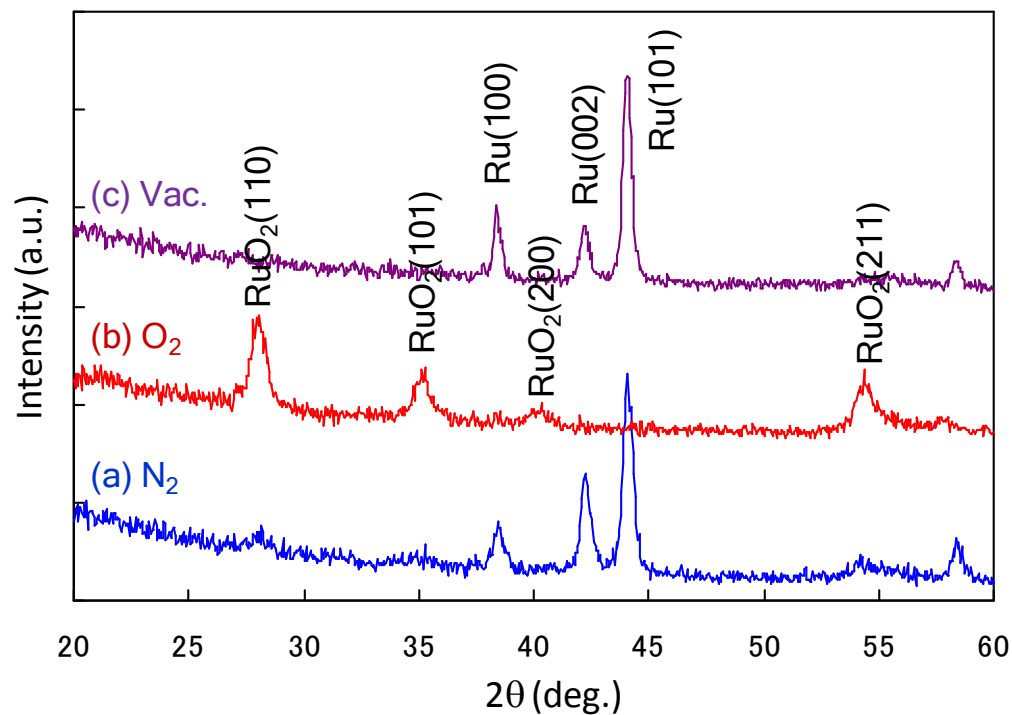

**Supplementary Figure S5.** XRD spectra of the thin films prepared from the precursor solution with MEA/Ru = 2 in (a) nitrogen, (b) oxygen and (c) vacuum at 500 °C for 10min.

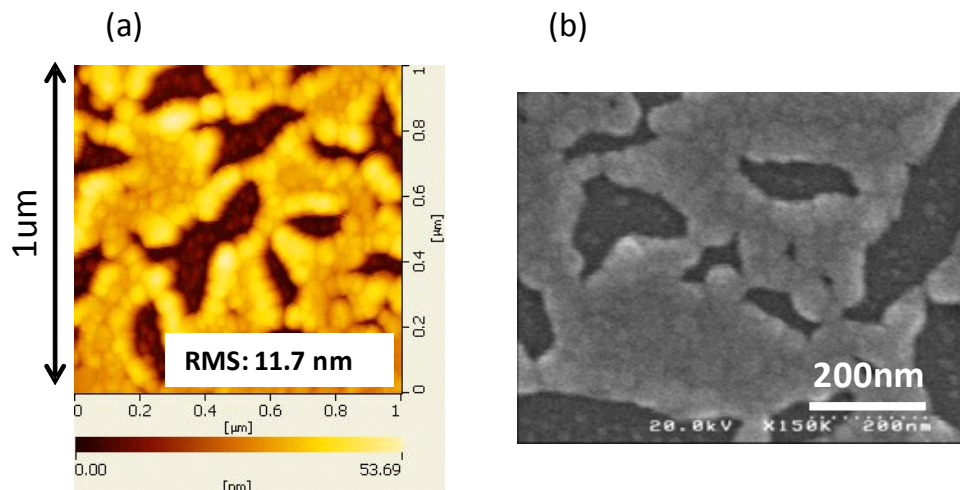

**Supplementary Figure S6.** AFM (a) and SEM (b) Images of the thin films prepared at 500° C for 10 min in vacuum from the precursor solution with MEA/Ru = 2.

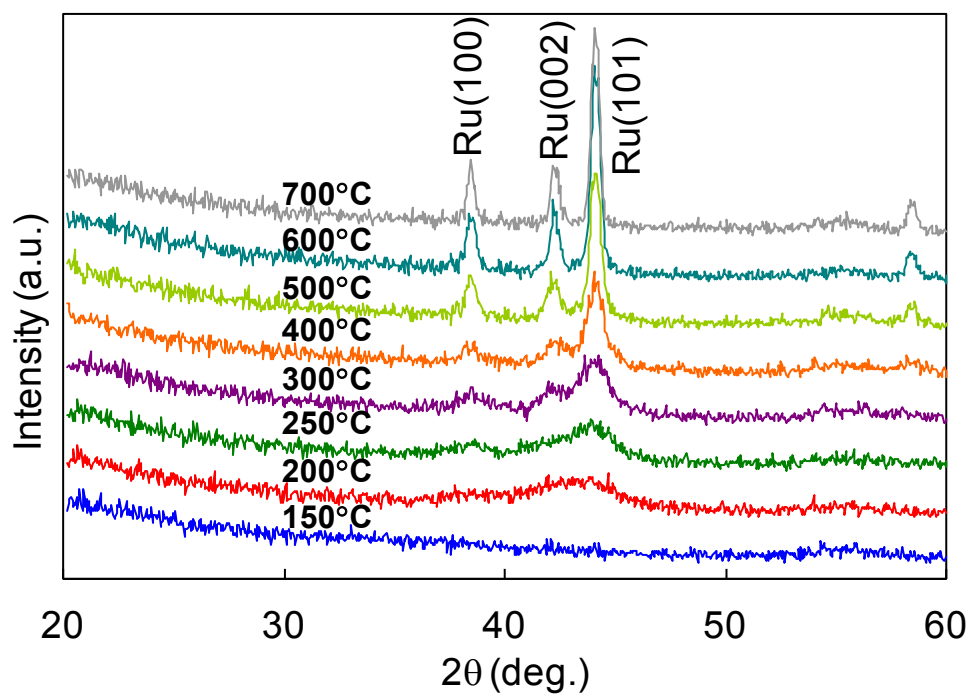

**Supplementary Figure S7.** XRD patterns of thin films prepared from the solution with MEA/Ru = 2 in vacuum at various annealing temperatures for 10 min.

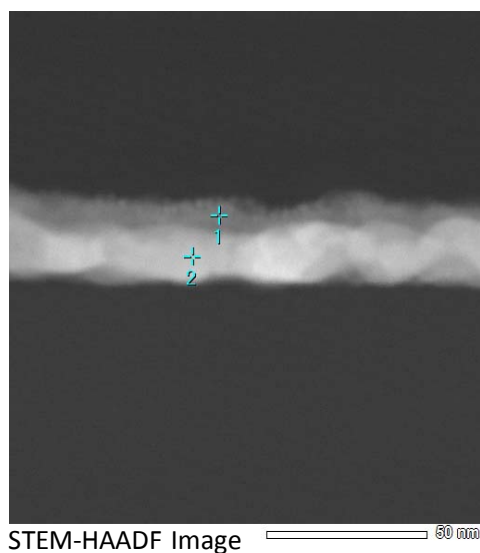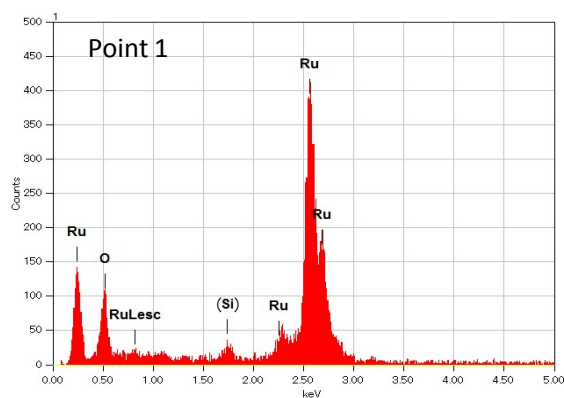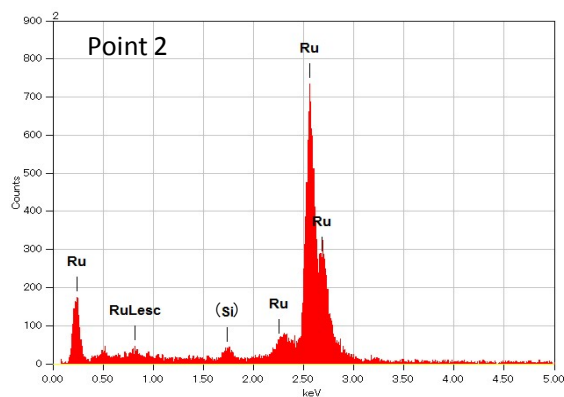

**Supplementary Figure S8.** EDX point analysis of the film prepared in nitrogen at 500°C from the solution with MEA/Ru = 2.

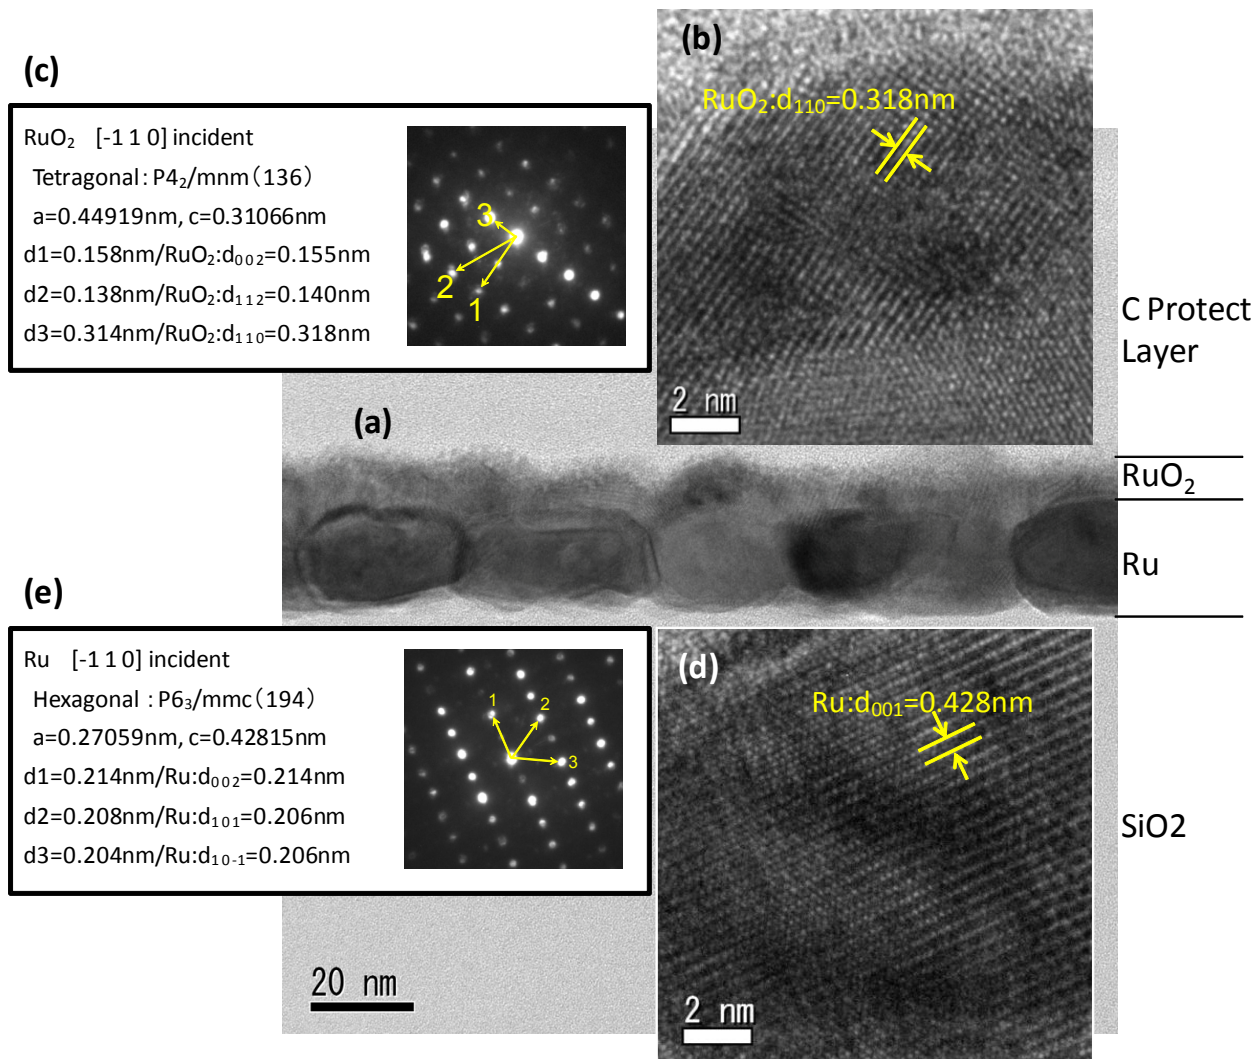

**Supplementary Figure S9.** TEM analysis of the film prepared in nitrogen at 500° C from the solution with MEA/Ru = 2. (a) Overview. (b and d) High resolution images of the surface RuO<sub>2</sub> (b) and the Ru metal film (d). (c and e) Nano-beam electron diffraction of the surface RuO<sub>2</sub> (c) and the Ru metal film (e).

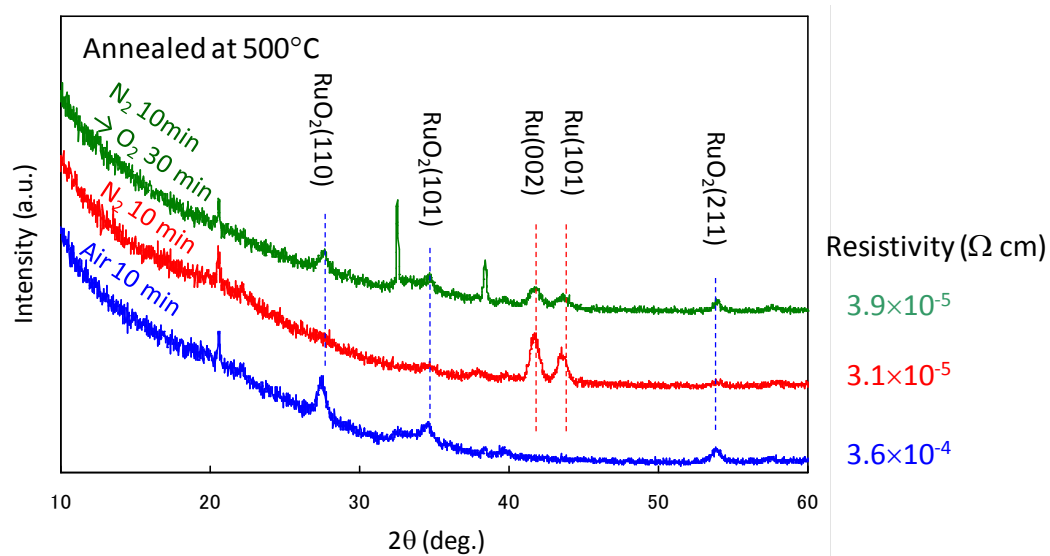

**Supplementary Figure S10.** XRD patterns and resistivity of thin films prepared from the solutions with MEA/Ru = 2.

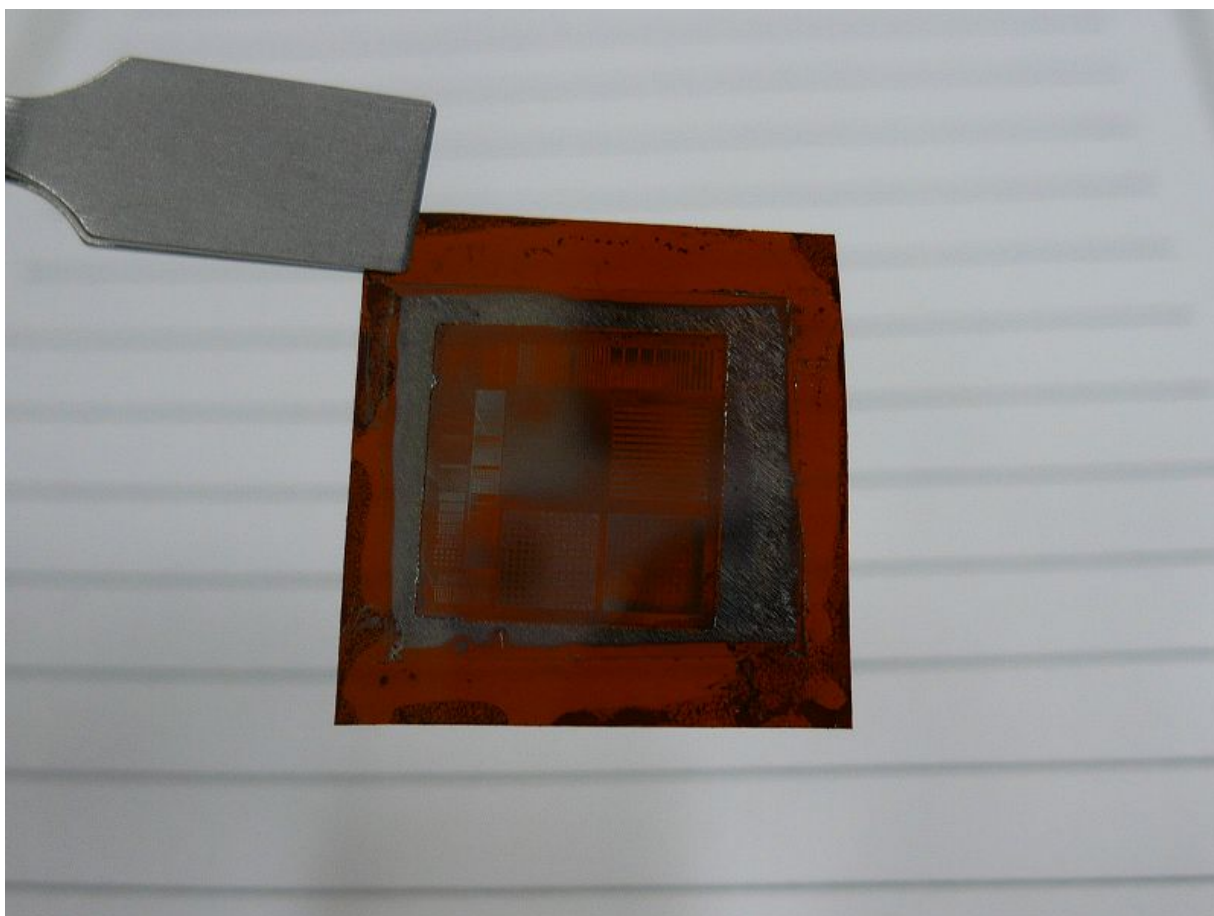

**Supplementary Figure S11.** Photograph of  $Ru^0$  patterns directly imprinted on a polyimide substrate.
